# Supplementary material for: Biorefinery of Tomato Leaves by Integrated Extraction and Membrane Processes to Obtain Fractions That Enhance Induced Resistance against Pseudomonas syringae Infection
Source: MDPI journal article supplement (doi:10.3390/membranes12060585), 2022-05-31
Supplement: s1 [file s1]

Supplementary Materials:

# Biorefinery of Tomato Leaves by Integrated Extraction and Membrane Processes to Obtain Fractions That Enhance Induced Resistance against *Pseudomonas syringae* Infection

Fabio Bazzarelli <sup>1</sup>, Rosalinda Mazzei <sup>1,\*</sup>, Emmanouil Papaioannou <sup>2,\*</sup>, Vasileios Giannakopoulos <sup>3</sup>, Michael R. Roberts <sup>3</sup> and Lidietta Giorno <sup>1</sup>

<sup>1</sup> National Research Council of Italy, Institute on Membrane Technology, CNR-ITM, via P. Bucci 17 C, 87036 Rende, Italy; f.bazzarelli@itm.cnr.it (F.B.); r.mazzei@itm.cnr.it (R.M.); l.giorno@itm.cnr.it (L.G.)

<sup>2</sup> Engineering Department, Lancaster University, Lancaster, LA1 4YW, UK; e.papaioannou@lancaster.ac.uk (E.P.)

<sup>3</sup> Lancaster Environment Centre, Lancaster University, Lancaster, LA1 4YQ, UK; v.giannakopoulos@lancaster.ac.uk (V.G.); m.r.roberts@lancaster.ac.uk (M.R.R.)

\* Correspondence: r.mazzei@itm.cnr.it (R.M.); e.papaioannou@lancaster.ac.uk (E.P.)

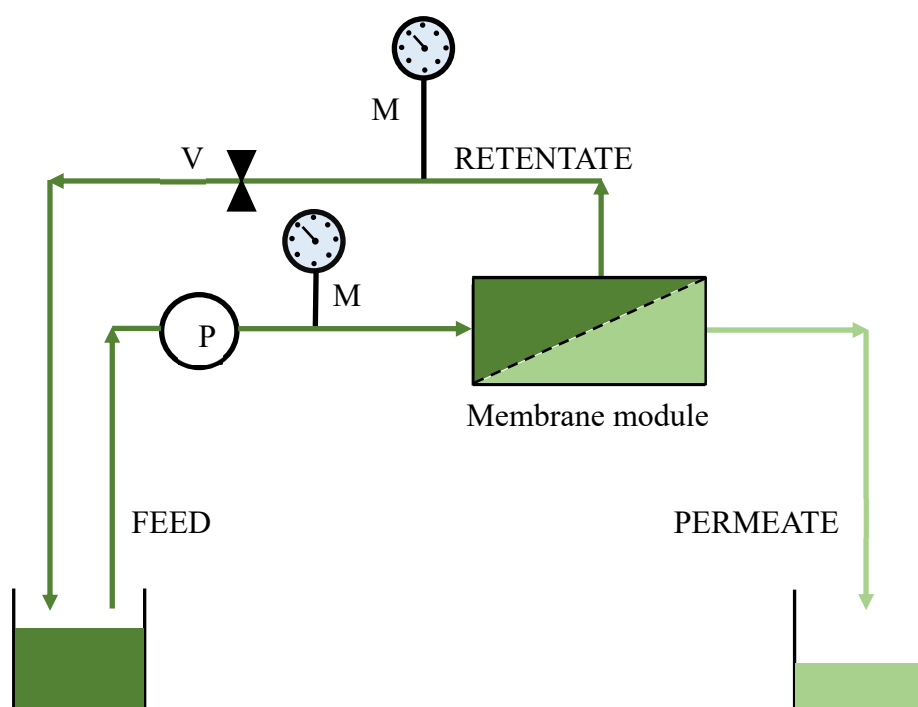

Figure S1. Membrane process (M: manometer, P: pump, V: valve)
